# Supplementary material
Source: ML conference proceedings conference paper supplement (https://proceedings.neurips.cc/paper_files/paper/2017/hash/ea159dc9788ffac311592613b7f71fbb-Abstract.html)
Supplement: Supplementary file [file ea159dc9788ffac311592613b7f71fbb-Supplemental.zip]

---

# Supplement to “Simple Strategies for Recovering Inner Products from Coarsely Quantized Random Projections”

---

**Ping Li**  
Baidu Research, and  
Rutgers University  
pingli98@gmail.com

**Martin Slawski**  
Department of Statistics  
George Mason University  
mslawsk3@gmu.edu

## Part I: Analysis

### A Preparations

For the convenience of the reader, we here repeat material from the paper that will be frequently referred to in this supplement. For  $r \in (-1, 1)$ , we consider bivariate Gaussian random variables

$$(Z, Z')_r \sim N_2 \left( \begin{pmatrix} 0 \\ 0 \end{pmatrix}, \begin{pmatrix} 1 & r \\ r & 1 \end{pmatrix} \right). \quad (\text{A.1})$$

For non-negative integers  $\alpha, \beta$ , we define coefficients  $\theta_{\alpha, \beta}$  by

$$\begin{aligned} \theta_{\alpha, \beta} &:= \mathbf{E}_\rho [Q(Z)^\alpha Q(Z')^\beta] \\ &= \sum_{\sigma, \sigma' \in \{-1, 1\}} \sum_{s, u=1}^K \sigma^\alpha (\sigma')^\beta \mu_s^\alpha \mu_u^\beta \mathbf{P}_\rho (Z \in \sigma(t_{s-1}, t_s), Z' \in \sigma'(t_{u-1}, t_u)), \end{aligned} \quad (\text{A.2})$$

where  $(Z, Z')$  are bivariate normal (A.1) with  $r = \rho$ . We recall that  $\{t_k\}_{k=1}^{K-1}$  and  $\{\mu_k\}_{k=1}^K$ ,  $K = 2^{b-1}$ , denote the thresholds and codes, respectively, associated with a  $b$ -bit scalar quantizer  $Q$ .

### B Proof of Theorem 1

Consider the linear estimator  $\hat{\rho}_{\text{lin}} = \langle q, q' \rangle / k$  based on quantized data  $q, q'$ .

**Theorem 1.** *We have  $\text{Bias}_\rho^2(\hat{\rho}_{\text{lin}}) \leq 4\rho^2 D_b^2$ , where  $D_b = \frac{3^{3/2} 2\pi}{12} 2^{-2b} \approx 2.72 \cdot 2^{-2b}$ .*

*Proof.* In the sequel, let  $Q(\cdot) = Q_b(\cdot; \mathbf{t}^*, \boldsymbol{\mu}^*)$  be the Lloyd-Max quantizer at bit depth  $b$  and let  $D_b := \mathbf{E}[\{Z - Q(Z)\}^2]$  be the associated squared distortion. A standard property of the Lloyd-Max quantizer is that (cf. [2], p. 180)

$$\mathbf{E}[Q(Z)(Q(Z) - Z)] = 0. \quad (\text{B.1})$$

This (B.1) immediately yields

$$\mathbf{E}[ZQ(Z)] = \mathbf{E}[Q(Z)^2] = \theta_{2,0}. \quad (\text{B.2})$$

according to notation (A.2). Therefore,

$$\begin{aligned} D_b &= \mathbf{E}[\{Z - Q(Z)\}^2] = \mathbf{E}[Z^2] - 2\mathbf{E}[ZQ(Z)] + \mathbf{E}[Q(Z)^2] \\ &= \mathbf{E}[Z^2] - \mathbf{E}[Q(Z)^2] \\ &= 1 - \theta_{2,0}. \end{aligned} \quad (\text{B.3})$$

Next, we note that

$$Z' \stackrel{\mathcal{D}}{=} \rho Z + \sqrt{1 - \rho^2} \xi \quad (\text{B.4})$$

with  $\xi \sim N(0, 1)$  independent of  $Z$ , where  $\stackrel{\mathcal{D}}{=}$  means equality in distribution. Combining (B.2) and (B.4), we obtain that

$$\begin{aligned} \mathbf{E}[Z'Q(Z)] &= \mathbf{E}[(\rho Z + \sqrt{1 - \rho^2} \xi)Q(Z)] \\ &= \rho \mathbf{E}[ZQ(Z)] \\ &= \rho \theta_{2,0}. \end{aligned} \quad (\text{B.5})$$

We now have

$$\begin{aligned} \mathbf{E}_\rho[\widehat{\rho}_{\text{lin}}] &= \mathbf{E}[Q(Z)Q(Z')] = \mathbf{E}[(Z + \{Q(Z) - Z\})(Z' + \{Q(Z') - Z'\})] \\ &= \mathbf{E}[ZZ'] + \mathbf{E}[Z\{Q(Z') - Z'\}] + \mathbf{E}[Z'\{Q(Z) - Z\}] + \\ &\quad + \mathbf{E}[\{Q(Z) - Z\}\{Q(Z') - Z'\}] \\ &= \rho + 2\mathbf{E}[Z'\{Q(Z) - Z\}] + \mathbf{E}[\{Q(Z) - Z\}\{Q(Z') - Z'\}] \\ &= \rho + 2\rho(\theta_{2,0} - 1) + \mathbf{E}[\{Q(Z) - Z\}\{Q(Z') - Z'\}] \\ &= \rho - 2\rho D_b + \mathbf{E}[\{Q(Z) - Z\}\{Q(Z') - Z'\}], \end{aligned} \quad (\text{B.6})$$

For the third identity from the top, we have used the fact that  $Z$  and  $Z'$  are exchangeable, and the last two identities follow from (B.5) and (B.3), respectively. Re-arranging (B.6), we obtain

$$\text{Bias}_\rho^2(\widehat{\rho}_{\text{lin}}) = (\mathbf{E}_\rho[\widehat{\rho}_{\text{lin}}] - \rho)^2 = \{-2\rho D_b + \mathbf{E}[\{Q(Z) - Z\}\{Q(Z') - Z'\}]\}^2 \quad (\text{B.7})$$

It is proved in Lemma 1 below that

$$0 \leq \mathbf{E}[\{Q(Z) - Z\}\{Q(Z') - Z'\}] \leq \rho D_b. \quad (\text{B.8})$$

Using that  $\rho \geq 0$  and combining (B.7) and (B.8), it follows that

$$\text{Bias}_\rho(\widehat{\rho}_{\text{lin}})^2 \leq 4\rho^2 D_b^2.$$

The following upper bound is well-known in the signal processing literature (cf. [3], p. 138)

$$D_b \leq \frac{3^{3/2} 2\pi}{12} \cdot 2^{-2b},$$

which yields the assertion. □

**Lemma 1.**

$$0 \leq \mathbf{E}[\{Q(Z) - Z\}\{Q(Z') - Z'\}] \leq \rho D_b. \quad (\text{B.9})$$

*Proof.* Define

$$\begin{aligned} \Delta_1(\rho) &= \mathbf{E}_\rho[ZZ'] - \mathbf{E}_\rho[ZQ(Z')] \\ \Delta_2(\rho) &= \mathbf{E}_\rho[ZQ(Z')] - \mathbf{E}_\rho[Q(Z)Q(Z')]. \end{aligned}$$

In the sequel, we will establish that for all  $\rho \in [0, 1]$ , it holds that

$$(\text{P1}) \quad \Delta_1(\rho) - \Delta_2(\rho) \geq 0,$$

$$(\text{P2}) \quad \Delta_2(\rho) \geq 0.$$

Relations (P1) and (P2) immediately yield (B.9). Indeed, we have

$$\begin{aligned} \mathbf{E}_\rho[(Z - Q(Z))(Z' - Q(Z'))] &= (\mathbf{E}_\rho[ZZ'] - \mathbf{E}_\rho[ZQ(Z')]) - (\mathbf{E}_\rho[Z'Q(Z)] - \mathbf{E}_\rho[Q(Z)Q(Z')]) \\ &= \Delta_1(\rho) - \Delta_2(\rho) \geq 0, \end{aligned}$$

which yields the lower bound in (B.9). Likewise,

$$\begin{aligned} \mathbf{E}_\rho[(Z - Q(Z))(Z' - Q(Z'))] &= (\mathbf{E}_\rho[ZZ'] - \mathbf{E}_\rho[ZQ(Z')]) - (\mathbf{E}_\rho[Z'Q(Z)] - \mathbf{E}_\rho[Q(Z)Q(Z')]) \\ &= \Delta_1(\rho) - \Delta_2(\rho) \\ &\leq \Delta_1(\rho) = \rho D_b, \end{aligned}$$

where the last identity follows with the same argument as used for (B.6) above. It thus remains to demonstrate (P1) and (P2).

Regarding (P2), we have

$$\Delta_2(0) = \mathbf{E}_{\rho=0}[ZQ(Z')] - \mathbf{E}_{\rho=0}[Q(Z)Q(Z')] = 0 \quad (\text{B.10})$$

$$\Delta_2(1) = \mathbf{E}_{\rho=1}[ZQ(Z')] - \mathbf{E}_{\rho=1}[Q(Z)Q(Z')] = \mathbf{E}[ZQ(Z)] - \mathbf{E}[Q(Z)^2] = 0, \quad (\text{B.11})$$

using (B.2) again. Property (P2) then follows from the following property:

$$(\text{P3}) \quad \text{The map } \rho \mapsto \theta_{1,1}(\rho) \text{ is convex on } [0, 1].$$

In fact, property (P3), which follows from Lemma 2 below, in turn implies that

$$\Delta_2(\rho) = \mathbf{E}_\rho[ZQ(Z')] - \mathbf{E}_\rho[Q(Z)Q(Z')] = \rho\theta_{2,0} - \theta_{1,1}(\rho),$$

is a concave function of  $\rho$ . Combining (B.10) and (B.11) with Jensen's inequality then yields that  $\Delta_2(\rho) \geq 0$  for  $\rho \in [0, 1]$ .

Regarding (P1), we expand

$$\begin{aligned} \Delta_1(\rho) - \Delta_2(\rho) &= (\rho - \rho\theta_{2,0}) - (\rho\theta_{2,0} - \theta_{1,1}(\rho)) \\ &= \rho(1 - 2\theta_{2,0}) + \theta_{1,1}(\rho). \end{aligned}$$

We first note that

$$\Delta_1(0) - \Delta_2(0) = 0 \quad (\text{B.12})$$

To deduce (P1) given (B.12), one then shows that the map

$$\rho \mapsto \Delta_1(\rho) - \Delta_2(\rho) \quad (\text{B.13})$$

is non-decreasing on  $[0, 1]$ . We do this by obtaining the derivative

$$\gamma(\rho) := \frac{d}{d\rho}(\Delta_1(\rho) - \Delta_2(\rho)) = 1 - 2\theta_{2,0} + \frac{d}{d\rho}\theta_{1,1}(\rho).$$

Denoting  $\nu(\rho) := \frac{d}{d\rho}\theta_{1,1}(\rho)$ , one computes that

$$\nu(0) = \theta_{2,0}^2 \quad (\text{B.14})$$

as an immediate consequence of Lemma 2 below. Substituting this back into  $\gamma$ , one obtains

$$\gamma(0) = 1 - 2\theta_{2,0} + \theta_{2,0}^2 = (1 - \theta_{2,0})^2 > 0.$$

Given (P3),  $\frac{d}{d\rho}\theta_{1,1}(\rho)$  is non-decreasing on  $[0, 1]$  and hence  $\gamma(\rho) \geq 0$  on  $[0, 1]$ , which in turn implies that the map (B.13) is non-decreasing. Combining this with (B.12) yields (P1) and thus the proof of the lemma.  $\square$

Property (P3) and (B.14) can be deduced from the following lemma.

**Lemma 2.** *Let  $f : \mathbb{R} \rightarrow \mathbb{R}$  be uniformly bounded. Consider the following map defined on  $[0, 1]$ :*

$$\rho \mapsto \eta_f(\rho) := \mathbf{E}_\rho[f(Z)f(Z')], \quad (Z, Z') \sim N_2\left(\begin{bmatrix} 0 \\ 0 \end{bmatrix}, \begin{bmatrix} 1 & \rho \\ \rho & 1 \end{bmatrix}\right).$$

*Then  $\eta_f$  obeys the following series expansion:*

$$\eta_f(\rho) = \sum_{k=0}^{\infty} \frac{\rho^k}{k!} \left( \int f(x) H_k(x) \phi(x) dx \right)^2, \quad (\text{B.15})$$

*where  $\phi$  denotes the standard Gaussian PDF and  $H_k$  is the  $k$ -th Hermite polynomial defined by*

$$H_k(x) = (-1)^k \exp(x^2/2) \frac{d^k}{dx^k} \exp(-x^2/2), \quad k = 0, 1, \dots$$

*Proof.* From a result in [1], p. 133, the PDF of  $(Z, Z')$ , say  $\phi_\rho$ , can be expanded as

$$\phi_\rho(x, y) = \sum_{k=0}^{\infty} \frac{\rho^k}{k!} H_k(x) H_k(y) \phi(x) \phi(y).$$

Using this result, we obtain that

$$\begin{aligned} \eta_f(\rho) &= \int \int f(x) f(y) \phi_\rho(x, y) dx dy \\ &= \int \int f(x) f(y) \sum_{k=0}^{\infty} \frac{\rho^k}{k!} H_k(x) H_k(y) \phi(x) \phi(y) dx dy \end{aligned}$$

Since  $f$  is uniformly bounded, the  $\{H_k\}_{k=0}^{\infty}$  are polynomials and  $\phi$  is a Schwartz function, each partial sum associated with the series inside the integrand is uniformly bounded. We may hence appeal to the bounded convergence theorem to obtain that

$$\begin{aligned} \eta_f(\rho) &= \sum_{k=0}^{\infty} \frac{\rho^k}{k!} \int \int f(x) f(y) H_k(x) H_k(y) \phi(x) \phi(y) dx dy \\ &= \sum_{k=0}^{\infty} \frac{\rho^k}{k!} \left( \int f(x) H_k(x) \phi(x) dx \right)^2. \end{aligned}$$

□

We apply Lemma 2 with the quantization map, i.e.,  $f = Q$ . Expansion (B.15) yields that the second derivative of  $\theta_{1,1}(\rho)$  is non-negative, and thus convexity. Similarly, (B.14) can be obtained by term-wise differentiation of (B.15), and evaluation of the result at zero, noting that  $H_1(x) = x$ , and using again that  $\mathbf{E}[ZQ(Z)] = \theta_{2,0}$  (B.2).

## C Proof of Proposition 1

Consider the normalized estimator  $\hat{\rho}_{\text{lin}} = \langle q, q' \rangle / (\|q\|_2 \|q'\|_2)$  based on quantized data  $q, q'$ .

**Proposition 1.** *In terms of the coefficients  $\theta_{\alpha,\beta}$  defined in (A.2), as  $k \rightarrow \infty$ , we have*

$$|\text{Bias}_\rho[\hat{\rho}_{\text{norm}}]| = \left| \frac{\theta_{1,1}}{\theta_{2,0}} - \rho \right| + O(k^{-1}), \quad (\text{C.1})$$

$$\text{Var}(\hat{\rho}_{\text{norm}}) = \frac{1}{k} \left( \frac{\theta_{2,2}}{\theta_{2,0}^2} - \frac{2\theta_{1,1}\theta_{3,1}}{\theta_{2,0}^3} + \frac{\theta_{1,1}^2(\theta_{4,0} + \theta_{2,2})}{2\theta_{2,0}^4} \right) + O(k^{-2}). \quad (\text{C.2})$$

*Proof.* We first show (C.1). From a first-order Taylor expansion of  $(a, b) \mapsto \frac{a}{b}$  around  $(a_0, b_0)$ , we have

$$\frac{a}{b} = \frac{a_0}{b_0} + \frac{(a - a_0)}{b_0} - \frac{(b - b_0)a_0}{b_0^2} + O((a - a_0)^2) + O((b - b_0)^2) \quad \text{as } a \rightarrow a_0, b \rightarrow b_0.$$

Using this with  $a = \langle q, q' \rangle / k$  and  $b = \sqrt{\frac{1}{k} \|q\|_2^2 \frac{1}{k} \|q'\|_2^2}$ ,  $a_0 = \mathbf{E}[a]$ ,  $b_0 = \mathbf{E}[b]$ , and taking expectations, we obtain that

$$\mathbf{E}[\hat{\rho}_{\text{norm}}] = \mathbf{E} \left[ \frac{\frac{1}{k} \langle q, q' \rangle}{\sqrt{\frac{1}{k} \|q\|_2^2 \frac{1}{k} \|q'\|_2^2}} \right] = \frac{\mathbf{E}[\hat{\rho}_{\text{lin}}]}{\mathbf{E} \left[ \sqrt{\frac{1}{k} \|q\|_2^2 \frac{1}{k} \|q'\|_2^2} \right]} + O(1/k) \quad \text{as } k \rightarrow \infty. \quad (\text{C.3})$$

Let us now turn our attention to the expectation in the denominator. Let  $X_0 = \frac{1}{k} \|q\|_2^2 \frac{1}{k} \|q'\|_2^2$  and  $E_0 = \mathbf{E}[X_0]$ . We have

$$\mathbf{E} \left[ \sqrt{\frac{1}{k} \|q\|_2^2 \frac{1}{k} \|q'\|_2^2} \right] = \mathbf{E} \left[ \sqrt{E_0} + \frac{X_0 - E_0}{2\sqrt{E_0}} + O((X_0 - E_0)^2) \right] \quad \text{as } X_0 \rightarrow E_0 \quad (\text{C.4})$$

$$= \sqrt{E_0} + O(1/k) \quad \text{as } k \rightarrow \infty. \quad (\text{C.5})$$

For  $E_0$  we obtain that

$$\begin{aligned}
E_0 &= \mathbf{E} \left[ \frac{1}{k} \|q\|_2^2 \frac{1}{k} \|q'\|_2^2 \right] \\
&= \mathbf{E} \left[ \left\{ \frac{1}{k} \sum_{l=1}^k Q(z_{(l)})^2 \right\} \left\{ \frac{1}{k} \sum_{m=1}^k Q(z'_{(m)})^2 \right\} \right] \\
&= \mathbf{E} \left[ \frac{1}{k^2} \sum_{l \neq m} Q(z_{(l)})^2 Q(z'_{(m)})^2 \right] + \mathbf{E} \left[ \frac{1}{k^2} \sum_{l=1}^k Q(z_{(l)})^2 Q(z'_{(l)})^2 \right] \\
&= \frac{k(k-1)}{k^2} \mathbf{E}[Q(z_{(1)})]^2 + \frac{1}{k} \mathbf{E}[Q(z_{(1)})^2 Q(z'_{(1)})^2] = \Psi^4 + O(1/k) \text{ as } k \rightarrow \infty. \quad (\text{C.6})
\end{aligned}$$

For the last line, we use that for  $l \neq m$ ,  $z_{(l)}$  and  $z'_{(m)}$  are independent and that  $\{Q(z_{(l)}), Q(z'_{(l)})\}_{l=1}^k$  are identically distributed. Combining (C.3), (C.4), (C.6) and using one more first-order Taylor expansion for the resulting  $O(1/k)$  term in the denominator in (C.3), the result (C.1) follows.

Let us now turn to the expression for the variance (C.2). Let  $a = \langle q, q' \rangle / k$ ,  $b = \|q\|_2^2 / k$ , and  $c = \|q'\|_2^2 / k$  and consider the function  $\phi(a, b, c) = a / \sqrt{b \cdot c}$  so that  $\text{Var}(\hat{\rho}_{\text{norm}}) = \text{Var}(\phi(a, b, c))$ . By a first-order Taylor expansion of  $\phi$  around  $(\mathbf{E}[a], \mathbf{E}[b], \mathbf{E}[c])$ , we obtain

$$\text{Var}(\hat{\rho}_{\text{norm}}) = \nabla \phi(\mathbf{E}[a], \mathbf{E}[b], \mathbf{E}[c])^\top \text{Cov}_{a,b,c} \nabla \phi(\mathbf{E}[a], \mathbf{E}[b], \mathbf{E}[c]) + O(1/k^2), \text{ as } k \rightarrow \infty,$$

where

$$\begin{aligned}
\text{Cov}_{a,b,c} &= \frac{1}{k} \begin{pmatrix} \theta_{2,2} - \theta_{1,1}^2 & \theta_{3,1} - \theta_{1,1}\theta_{2,0} & \theta_{3,1} - \theta_{1,1}\theta_{2,0} \\ \theta_{3,1} - \theta_{1,1}\theta_{2,0} & \theta_{4,0} - \theta_{2,0}^2 & \theta_{2,2} - \theta_{2,0}^2 \\ \theta_{3,1} - \theta_{1,1}\theta_{2,0} & \theta_{2,2} - \theta_{2,0}^2 & \theta_{4,0} - \theta_{2,0}^2 \end{pmatrix}, \quad (\text{C.7}) \\
\nabla \phi(a, b, c) &= \left( \frac{1}{\sqrt{b \cdot c}}, -\frac{1}{2} b^{-3/2} \frac{a}{\sqrt{c}}, -\frac{1}{2} c^{-3/2} \frac{a}{\sqrt{b}} \right)^\top.
\end{aligned}$$

The expression for the covariance  $\text{Cov}_{a,b,c}$  of  $a$ ,  $b$  and  $c$  is obtained by direct calculation in terms of coefficients (A.2). Evaluating  $\nabla \phi(a, b, c)$  at  $(\mathbf{E}[a] = \theta_{1,1}, \mathbf{E}[b] = \theta_{2,0}, \mathbf{E}[c] = \theta_{2,0})$  yields

$$\nabla \phi(\mathbf{E}[a], \mathbf{E}[b], \mathbf{E}[c]) = \left( \frac{1}{\theta_{2,0}} - \frac{\theta_{1,1}}{2\theta_{2,0}^2} - \frac{\theta_{1,1}}{2\theta_{2,0}^2} \right)^\top.$$

The final expression (C.2) results by expanding the quadratic form and collecting terms.  $\square$

## D Proof of Theorem 2

**Theorem 2.** *For any finite  $b$ , we have*

$$\text{Var}_\rho(\hat{\rho}_{\text{norm}}) = \Theta((1 - \rho)^{1/2}), \quad \text{Var}_\rho(\hat{\rho}_{\text{col}}) = \Theta((1 - \rho)^{3/2}) \text{ as } \rho \rightarrow 1.$$

*Sketch.*

According to Proposition 1, we have that

$$\text{Var}_\rho(\hat{\rho}_{\text{norm}}) = \frac{1}{k} \left( \frac{\theta_{2,2}}{\theta_{2,0}^2} - \frac{2\theta_{1,1}\theta_{3,1}}{\theta_{2,0}^3} + \frac{1}{2} \frac{\theta_{1,1}^2(\theta_{4,0} + \theta_{2,2})}{\theta_{2,0}^4} \right) + O(1/k^2) \text{ as } k \rightarrow \infty. \quad (\text{D.1})$$

We have  $\theta_{1,1} \rightarrow \theta_{2,0}$ , as well as  $\theta_{3,1} \rightarrow \theta_{4,0}$  and  $\theta_{2,2} \rightarrow \theta_{4,0}$  as  $\rho \rightarrow 1$ . Based on arguments made in the proof of Theorem 1 in [4], it can be verified that the rate of convergence for all these limits is  $\Theta(\sqrt{1 - \rho})$ . Expanding the fraction in (D.1), it can then be seen that the numerator converges to zero at rate  $\Theta(\sqrt{1 - \rho})$ , while the denominator  $\theta_{2,0}^4$  does not depend on  $\rho$ .

The rate of decay of  $\text{Var}_\rho(\hat{\rho}_{\text{col}})$  can be directly deduced from Theorem 1 in [4], since in the limit the collision-based estimator  $\hat{\rho}_{\text{col}}$  coincides with the maximum likelihood estimator whose variance has been shown to decay at the rate  $\Theta((1 - \rho)^{3/2})$ .

## E Quantization of norms (§3.4 in the paper)

Let  $x, x'$  be a generic set of points from  $\mathcal{X} = \{x_1, \dots, x_n\}$ , and let  $\lambda = \|x\|_2$  and  $\lambda' = \|x'\|_2$  denote their norms. After quantizing the norms, we obtain  $\hat{\lambda}$  instead of  $\lambda$  and  $\hat{\lambda}'$  instead of  $\lambda'$ . Let  $\hat{\rho}$  be an estimator of the cosine similarity  $\rho = \frac{\langle x, x' \rangle}{\lambda \lambda'}$  of  $x$  and  $x'$ , and consider the following estimator of the squared distance  $\mathbf{d} = \|x - x'\|_2^2$ :

$$\hat{\mathbf{d}}^2 = \hat{\lambda}^2 + \hat{\lambda}'^2 - 2\hat{\lambda}\hat{\lambda}'\hat{\rho}$$

The MSE of  $\hat{\mathbf{d}}^2$  can then be bounded in terms of the MSE of  $\hat{\rho}$  and  $\varepsilon = \max\{|\hat{\lambda} - \lambda|, |\hat{\lambda}' - \lambda'|\}$ .

**Proposition 2.**

$$\mathbf{E}_\rho[\{\hat{\mathbf{d}}^2 - \mathbf{d}^2\}^2] \leq 4\lambda^2(\lambda')^2 \mathbf{E}_\rho[\{\hat{\rho} - \rho\}^2] + 8\lambda\lambda'(\lambda + \lambda')\varepsilon (2|\text{Bias}_\rho(\hat{\rho})| + \text{Var}_\rho(\hat{\rho})) + O(\varepsilon^2). \quad (\text{E.1})$$

*Proof.* Let us denote  $\delta = \hat{\lambda} - \lambda$  and  $\delta' = \hat{\lambda}' - \lambda'$ . We then have

$$\hat{\mathbf{d}}^2 = \hat{\lambda}^2 + \hat{\lambda}'^2 - 2\hat{\lambda}\hat{\lambda}'\hat{\rho} = \lambda^2 + 2\delta\lambda + \lambda'^2 + 2\delta'\lambda' - 2\lambda\lambda'\hat{\rho} - 2(\lambda\delta' + \lambda'\delta)\hat{\rho} + O(\varepsilon^2)$$

and thus

$$\hat{\mathbf{d}}^2 - \mathbf{d}^2 = \underbrace{2\lambda\lambda'(\rho - \hat{\rho})}_L + \underbrace{2\lambda(\delta - \delta'\hat{\rho})}_{R_1} + \underbrace{2\lambda'(\delta' - \delta\hat{\rho})}_{R_2} + O(\varepsilon^2).$$

Define  $R = R_1 + R_2$ . Then

$$\begin{aligned} \mathbf{E}_\rho[\{\hat{\mathbf{d}}^2 - \mathbf{d}^2\}^2] &= \mathbf{E}_\rho[(L + R)^2] = \mathbf{E}_\rho[L^2] + 2(\mathbf{E}_\rho[LR_1] + \mathbf{E}_\rho[LR_2]) + \mathbf{E}_\rho[R^2] + O(\varepsilon^2) \\ &= 4\lambda^2\lambda'^2 \mathbf{E}_\rho[(\rho - \hat{\rho})^2] + 2(\mathbf{E}_\rho[LR_1] + \mathbf{E}_\rho[LR_2]) + O(\varepsilon^2) \end{aligned} \quad (\text{E.2})$$

It remains to bound  $\mathbf{E}_\rho[LR_1]$  and  $\mathbf{E}_\rho[LR_2]$ . By collecting terms, we obtain that

$$\begin{aligned} \mathbf{E}_\rho[LR_1] &= 4\lambda^2\lambda' \mathbf{E}_\rho[(\rho - \hat{\rho})(\delta - \delta'\hat{\rho})] \\ &= 4\lambda^2\lambda' \{ \delta(\rho - \mathbf{E}_\rho[\hat{\rho}]) - \delta'\rho \mathbf{E}_\rho[\hat{\rho}] + \delta' \mathbf{E}_\rho[\hat{\rho}^2] \} \\ &= 4\lambda^2\lambda' \{ \delta(\rho - \mathbf{E}_\rho[\hat{\rho}]) - \delta'\rho \mathbf{E}_\rho[\hat{\rho}] + \delta'(\text{Var}_\rho(\hat{\rho}) + \mathbf{E}_\rho[\hat{\rho}^2]) \} \\ &= 4\lambda^2\lambda' \{ \delta(\rho - \mathbf{E}_\rho[\hat{\rho}]) + \delta' \mathbf{E}_\rho[\hat{\rho}](\mathbf{E}_\rho[\hat{\rho}] - \rho) + \delta' \text{Var}_\rho(\hat{\rho}) \} \\ &\leq 4\lambda^2\lambda' \varepsilon (2|\text{Bias}_\rho(\hat{\rho})| + \text{Var}_\rho(\hat{\rho})) \end{aligned} \quad (\text{E.3})$$

Similarly, it can be shown that

$$\mathbf{E}_\rho[LR_2] \leq 4\lambda\lambda'^2 \varepsilon (2|\text{Bias}_\rho(\hat{\rho})| + \text{Var}_\rho(\hat{\rho})) \quad (\text{E.4})$$

Combining (E.2), (E.3) and (E.4), we conclude the result.  $\square$

## Part II: Additional Figures

### Empirical verification of the asymptotic expressions in Proposition 1

The plots compares the asymptotic MSE of  $\hat{\rho}_{\text{norm}}$  according to Proposition 1 (solid grey line) to the empirical MSEs (black dots) for  $\rho \in \{0.01, 0.02, \dots, 0.99\}$  based on  $10^4$  independent simulations for different choices of  $k$ .

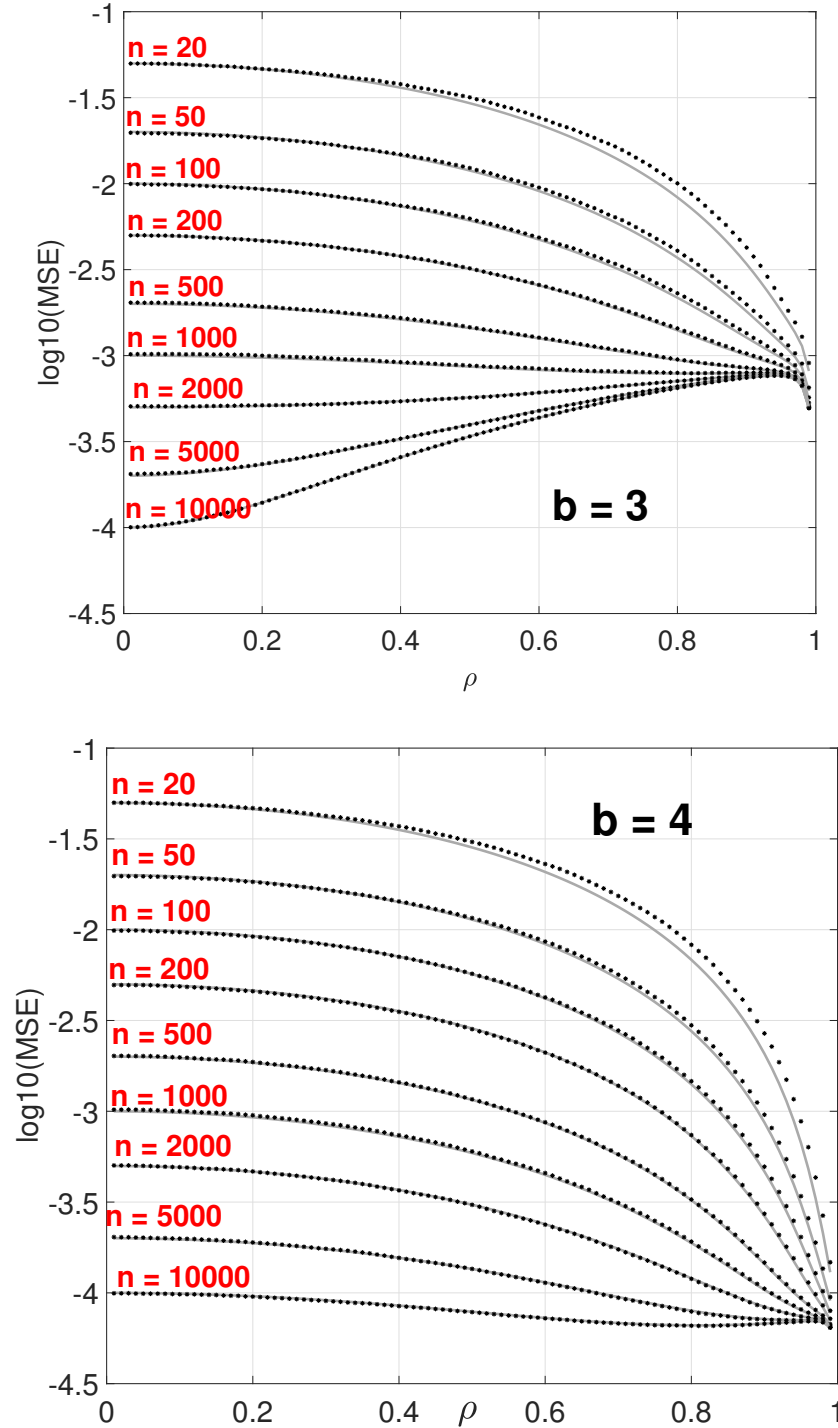

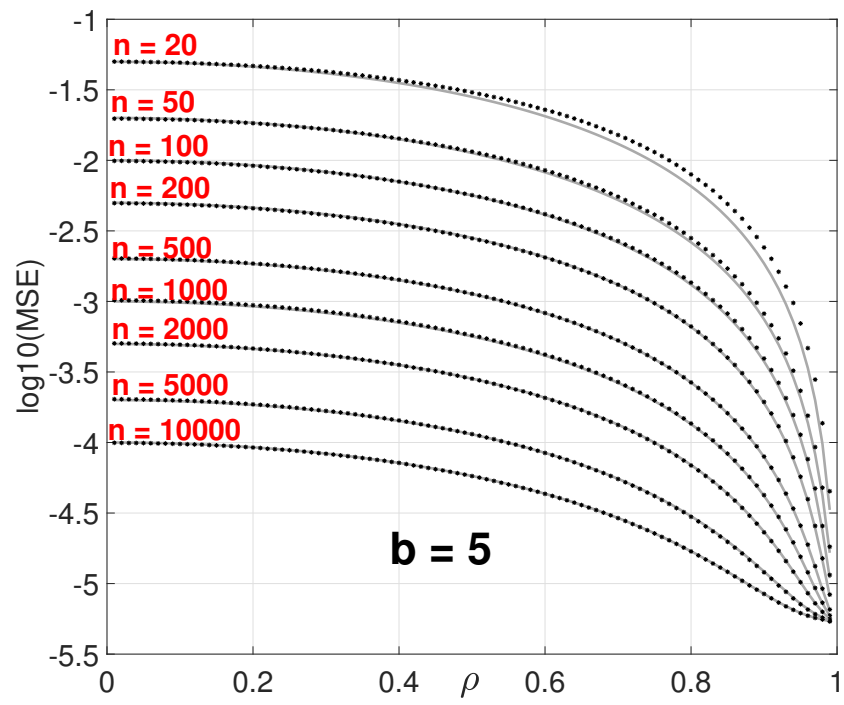

## Full set of plots for §4

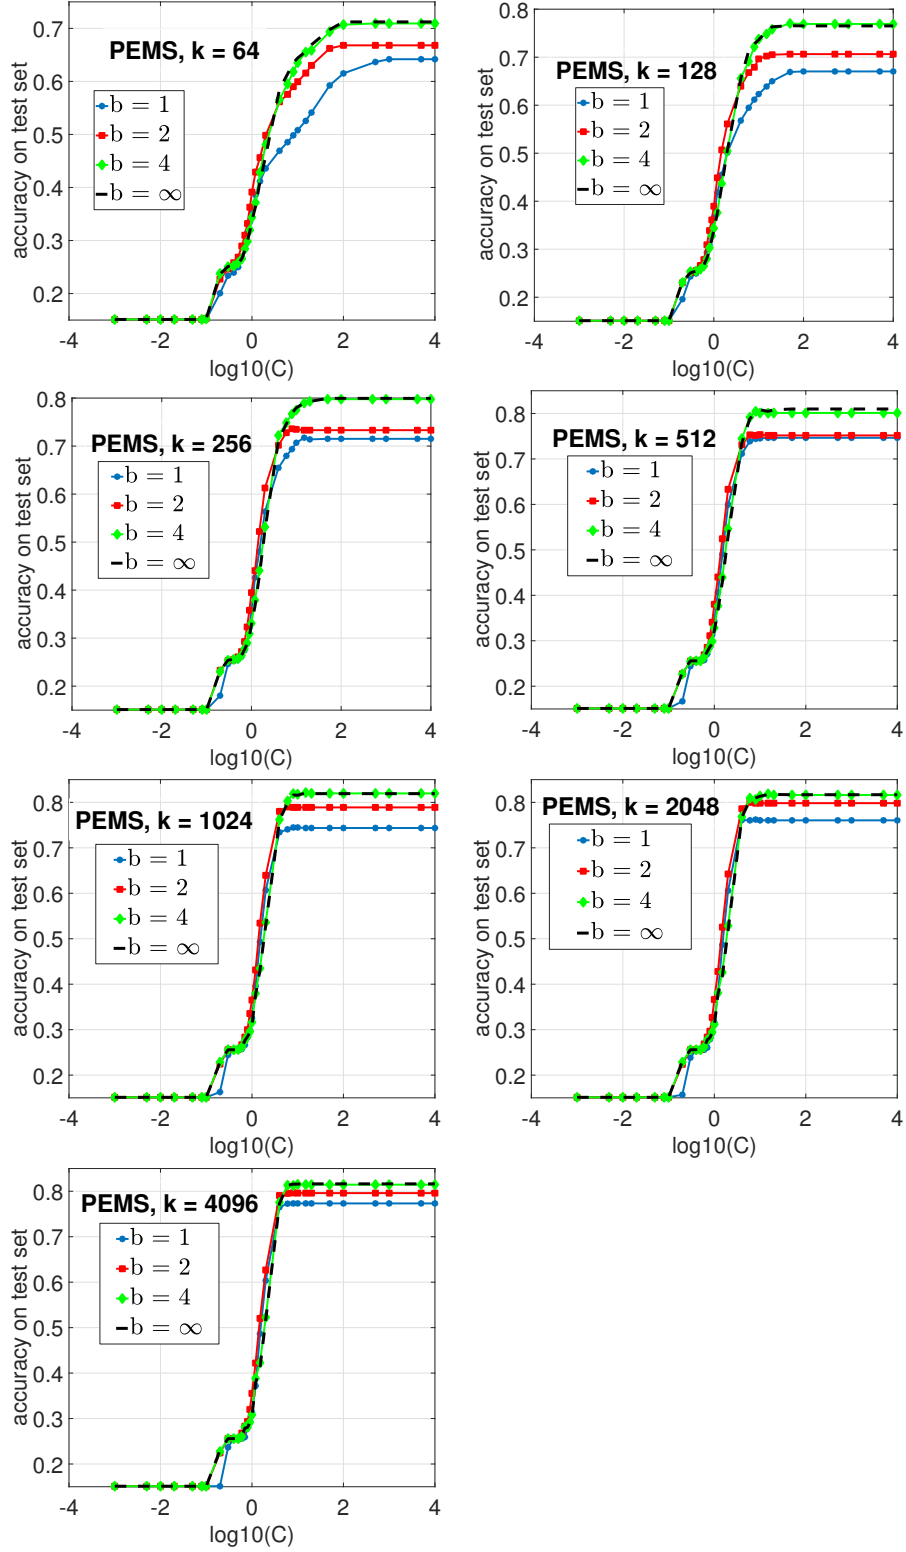

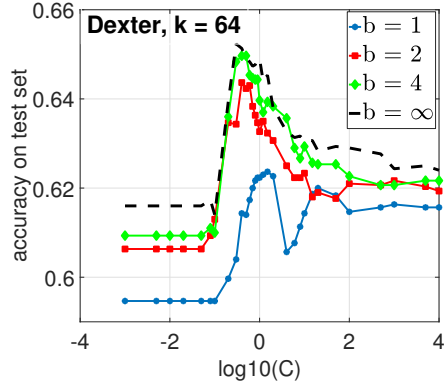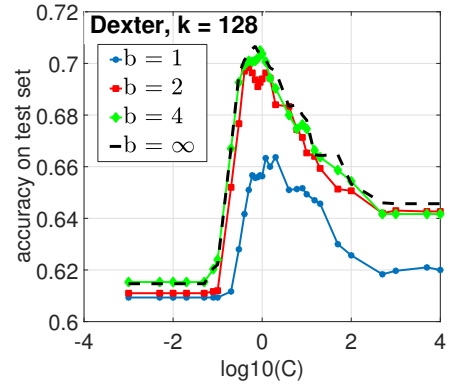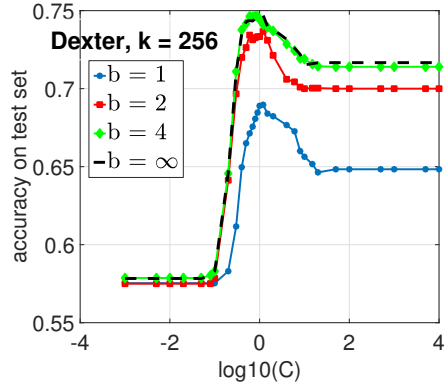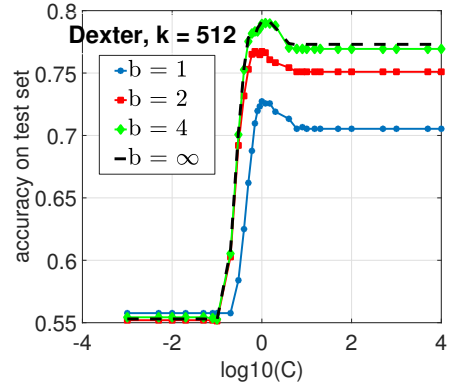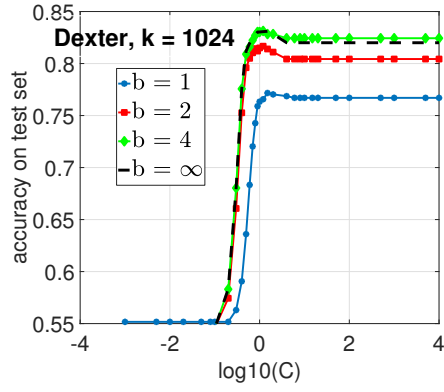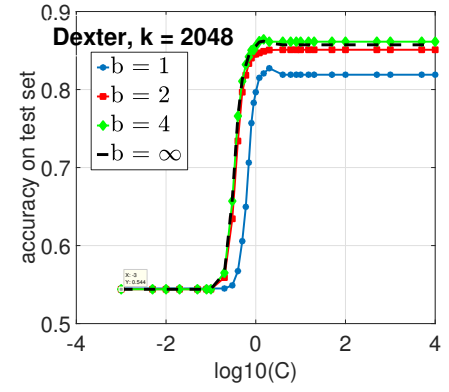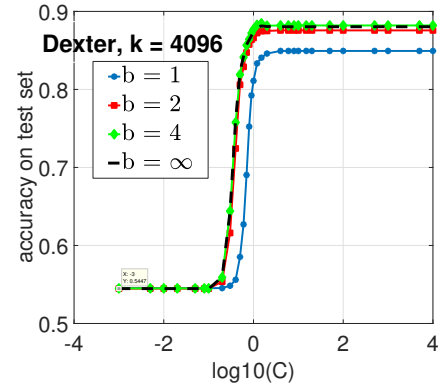

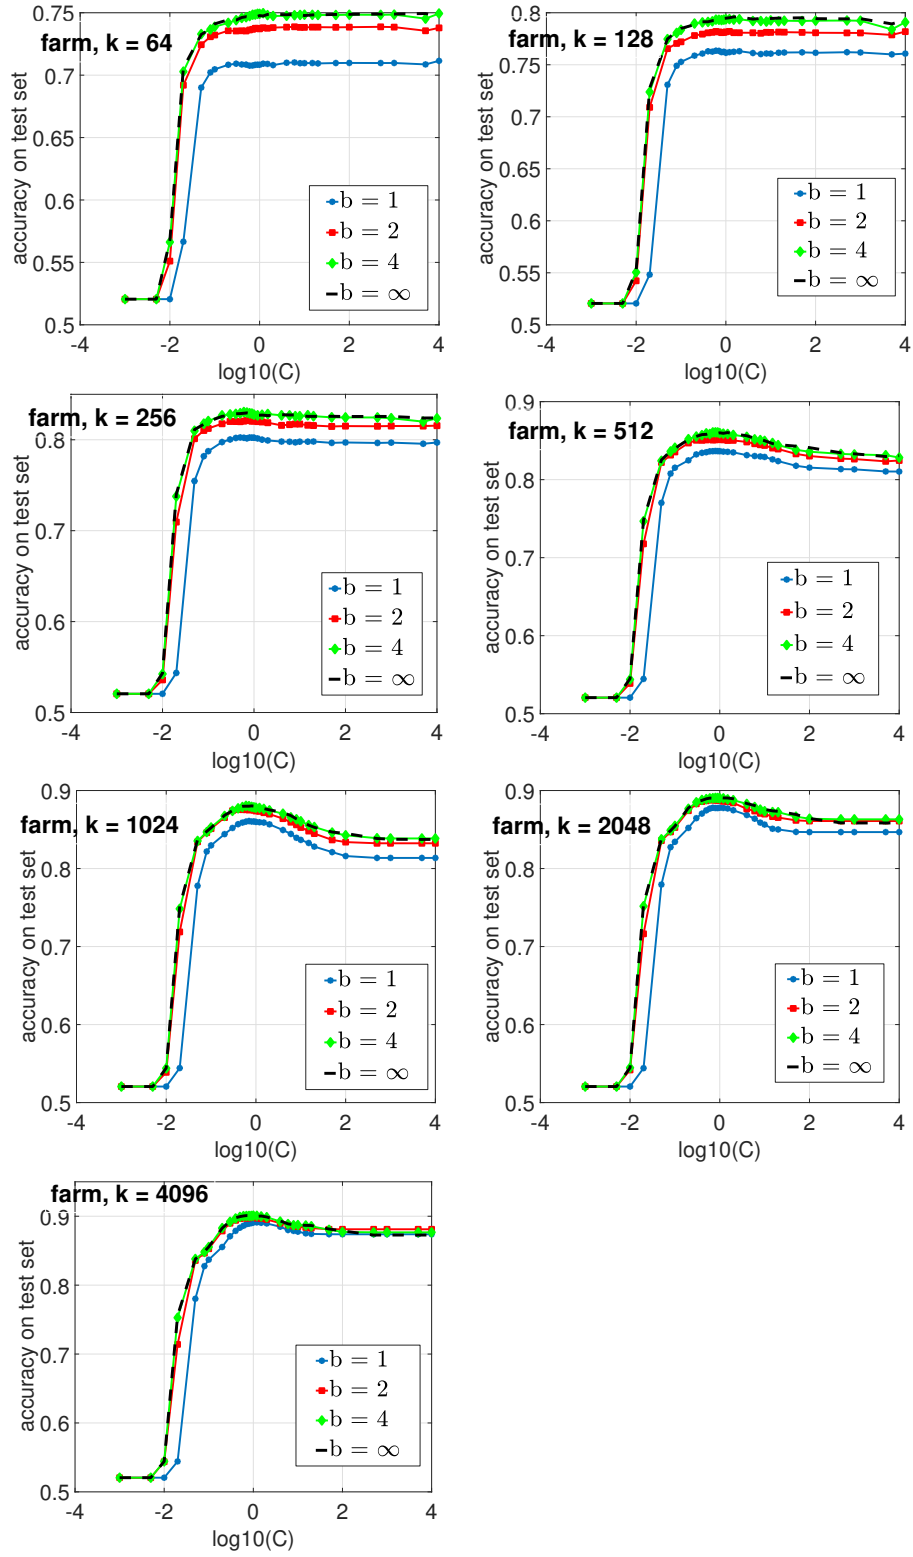

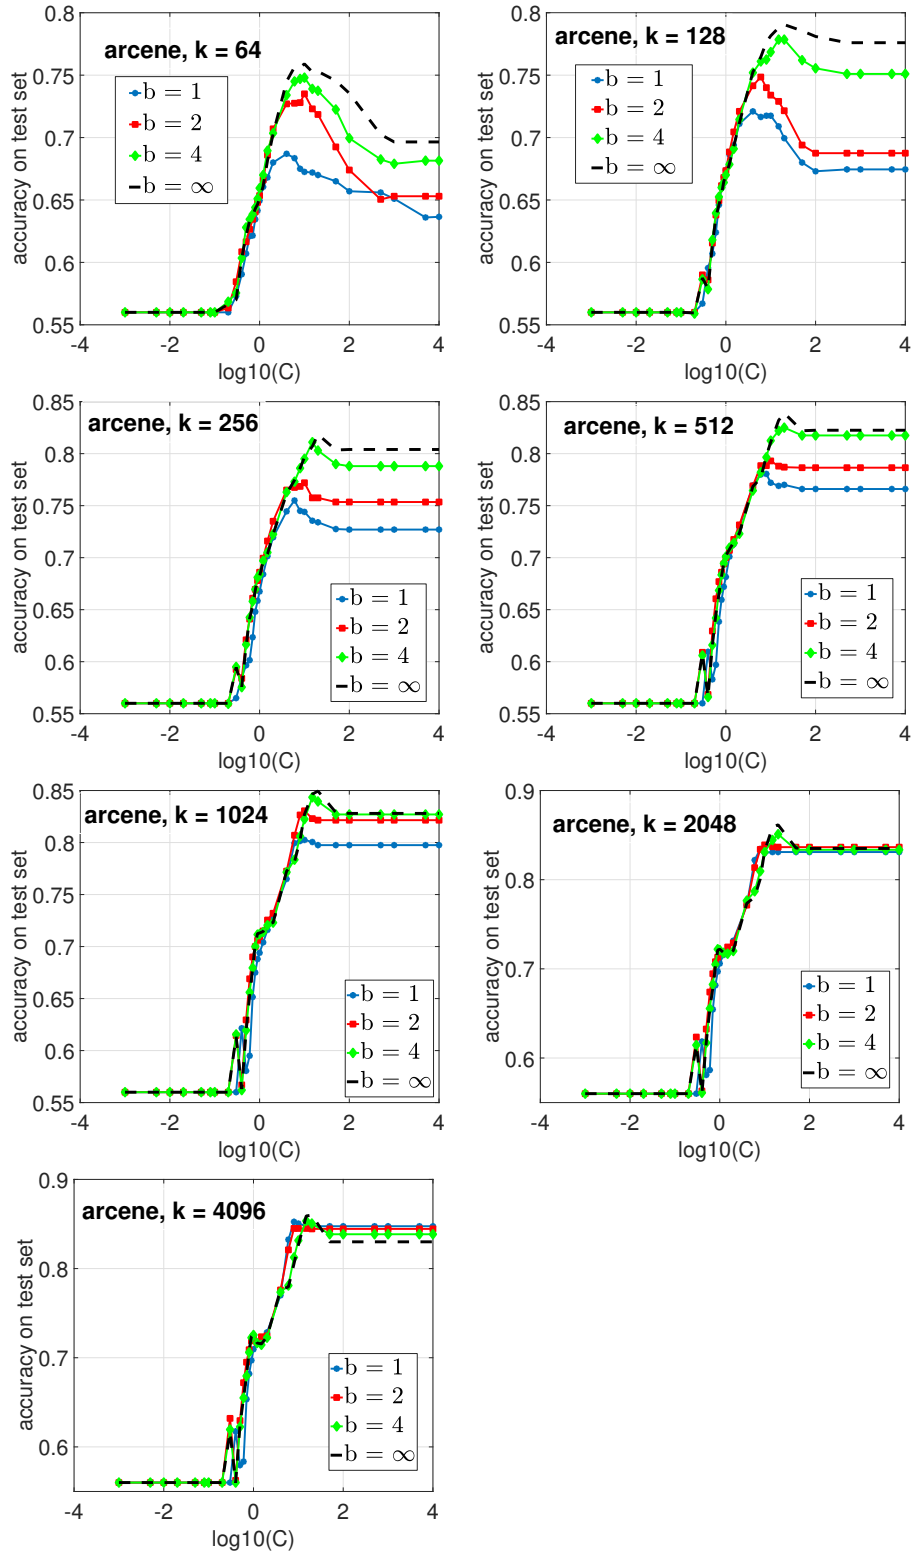

## References

- [1] H. Cramer. *Mathematical Methods of Statistics*. Princeton University Press, 1946.
- [2] A. Gersho and R. Gray. *Vector Quantization and Signal Compression*. Springer, 1991.
- [3] N. Jayant and P. Noll. *Digital coding of waveforms: principles and applications to speech and video*. Englewood Cliffs, 1984.
- [4] P. Li, M. Mitzenmacher, and M. Slawski. Quantized Random Projections and Non-Linear Estimation of Cosine Similarity. In *Advances in Neural Information Processing Systems (NIPS)*, pages 2756–2764. 2016.
